# Supplementary material
Source: PubMed Central journal article supplement (PMC3155259)
Supplement: NIHMS303130-supplement-03.pdf [file NIHMS303130-supplement-03.pdf]

Table 1. Quantification of different phenotypes observed in various cell lines under 500nM EMD534085 treatment.

A. Percentage of all 500nM EMD534085-treated cells that arrested in mitosis, divided or died from interphase.

B. Percentage of arrested cells that died, divided or slipped from mitotic arrest.

|                              | HL60 | H7    | K562 | TF1a | SU-DHL-8 | HeLa-H2bGFP* | HT29* | U-2 OS* | MCF7* | N/TERT-1* | A549 | RPE-1 |
|------------------------------|------|-------|------|------|----------|--------------|-------|---------|-------|-----------|------|-------|
| A. % of all cells            |      |       |      |      |          |              |       |         |       |           |      |       |
| mitotic arrest               | 96.4 | 98.9  | 98.3 | 98.8 | 99.0     | 99.0         | 99.4  | 99.1    | 99.1  | 99.9      | 97.9 | 98.6  |
| divide                       | 1.9  | 0.0   | 0.7  | 1.2  | 1.0      | 0.9          | 0.5   | 0.8     | 0.8   | 0.1       | 2.1  | 1.4   |
| death prior to mitotic entry | 1.7  | 1.1   | 1.0  | 0.0  | 0.0      | 0.1          | 0.1   | 0.1     | 0.1   | 0         | 0.0  | 0.0   |
| B. % of arrested cells       |      |       |      |      |          |              |       |         |       |           |      |       |
| division from arrest         | 0.0  | 0.0   | 5.5  | 5.9  | 2.9      | 0.5          | 3.0   | 5.3     | 1.8   | 0.0       | 0.0  | 0.0   |
| death in arrest              | 96.7 | 100.0 | 88.2 | 5.9  | 29.4     | 12.9         | 28.3  | 5.5     | 2.3   | 11.4      | 1.1  | 0.0   |
| slippage from arrest         | 3.3  | 0.0   | 6.3  | 88.2 | 67.7     | 86.6         | 68.7  | 89.2    | 95.9  | 88.6      | 98.9 | 100.0 |

HL60, H7, K562, TF1a, and SU-DHL-8 are from hematological lineage.

HeLa-H2bGFP, HT29, U-2 OS, MCF7, N/TERT-1, A549, and RPE-1 are from epithelial lineage.

\* Results of these cell lines were from [26] for comparison.
