# Supplementary material
Source: PubMed Central journal article supplement (PMC3155259)
Supplement: NIHMS303130-supplement-04.pdf [file NIHMS303130-supplement-04.pdf]

A.

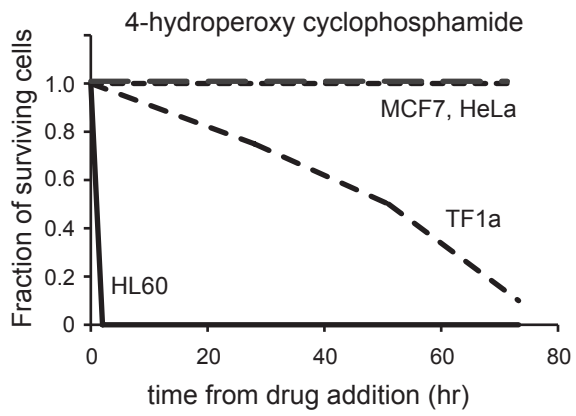

B.

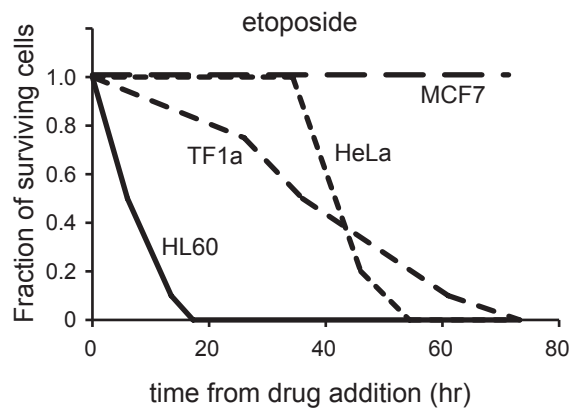

Supplemental Figure 1. Cumulative survival curves of HL60, TF1a, HeLa and MCF7 cells under treatment of 20  $\mu$ M 4-hydroperoxy-cyclophosphamide (A) and 30  $\mu$ M etoposide (B).
