# Supplementary material
Source: PubMed Central journal article supplement (PMC3155259)
Supplement: NIHMS303130-supplement-06.pdf [file NIHMS303130-supplement-06.pdf]

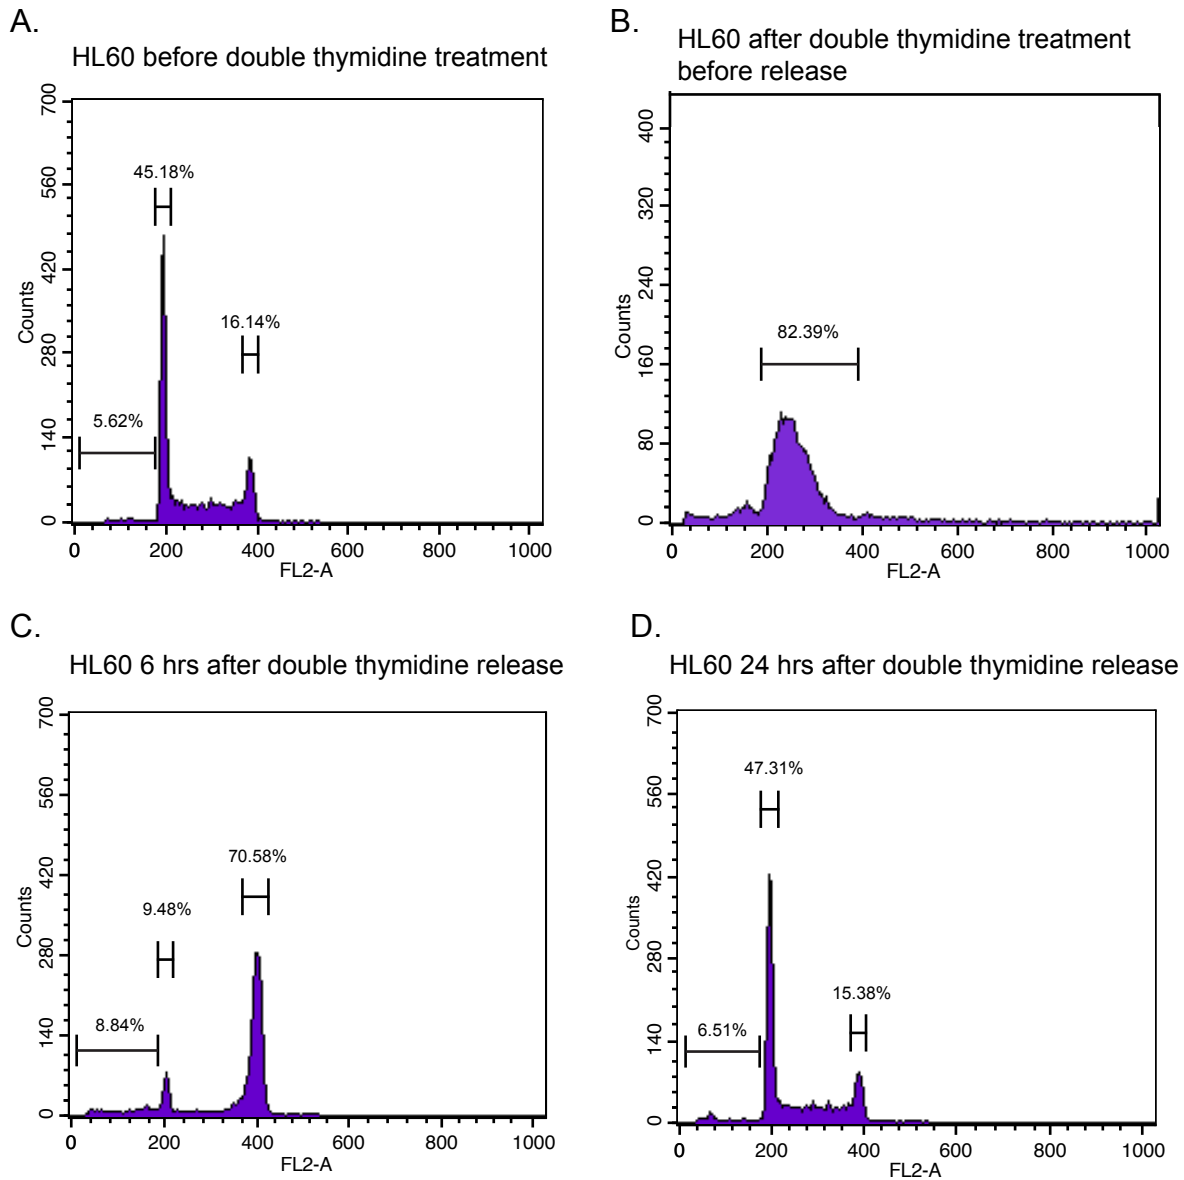

Supplemental Figure 3. FACS curves showing cell-cycle distributions of HL60 cells before double-thymidine treatment (A); after double-thymidine treatment before release (B); 6 hrs after being released from double-thymidine treatment to normal growth medium (C); and 24 hrs after being released from double-thymidine treatment to normal growth medium (D).
