# Supplementary material
Source: PubMed Central journal article supplement (PMC3155259)
Supplement: NIHMS303130-supplement-07.pdf [file NIHMS303130-supplement-07.pdf]

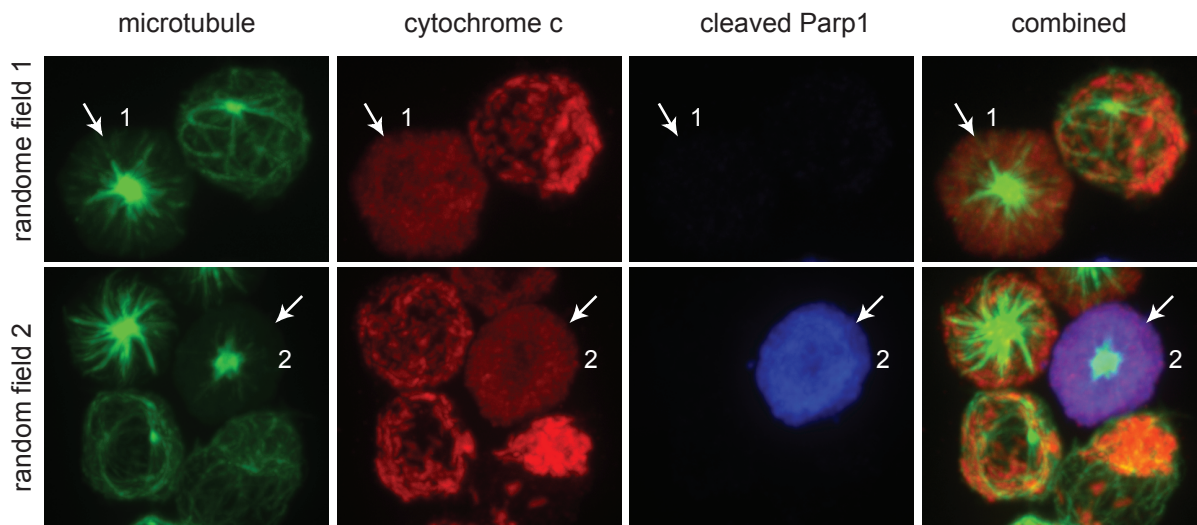

Supplemental Figure 4. Immunofluorescence images of EMD534085-treated HL60 cells in two random fields, co-stained for microtubules, cytochrome c, and cleaved-Parp1. Cleaved-Parp1 only appears in a portion of MOMP cells, during mitotic arrest.
